# Supplementary material
Source: PubMed Central journal article supplement (PMC5314726)
Supplement: Supp_Fig1.pdf [file Supp_Fig1.pdf]

## Supplementary Data

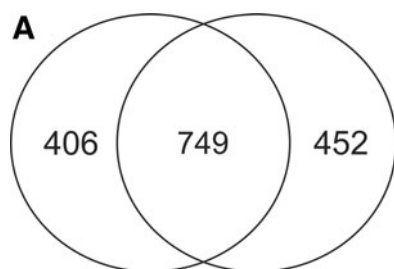

**B**

| Biochemical Family     | Urine | Plasma |
|------------------------|-------|--------|
| Amino Acid             | 200   | 151    |
| Peptide                | 37    | 59     |
| Carbohydrate           | 50    | 29     |
| Energy                 | 13    | 8      |
| Lipid                  | 114   | 296    |
| Nucleotide             | 46    | 31     |
| Cofactors and Vitamins | 36    | 28     |
| Xenobiotics            | 167   | 123    |
| Structural Unknowns    | 538   | 430    |

**SUPPLEMENTARY FIG. S1.** Comparison of the biochemical profiles of urine and plasma from similar cohorts. **(A)** Venn diagram analysis showing the number of biochemicals in plasma (*left circle*) and urine (*right circle*), and number of biochemicals detected in both matrices. **(B)** The biochemicals detected in urine and plasma represent different biological classes.
